# Supplementary material for: EBUS-TBNA Cytological Samples for Comprehensive Molecular Testing in Non–Small Cell Lung Cancer
Source: MDPI journal article supplement (doi:10.3390/cancers13092084), 2021-04-25
Supplement: s1 [file s1]

# EBUS-TBNA Cytological Samples for Comprehensive Molecular Testing in Non-small Cell Lung Cancer

Roberto Martín-Deleon, Cristina Teixido, Carmen M Lucena, Daniel Martinez, Ainhua Fontana, Roxana Reyes, Mireia García, Nuria Viñolas, Ivan Vollmer, Marcelo Sanchez, Pedro Jares, Francisco M Pérez, Naiara Vega, Elba Marin, Ramón M Marrades, Carlos Agustí, Noemi Reguart.

## Supplementary Material and Methods

### *DNA and Oncomine*

Briefly, DNA isolation and Next-Generation Sequencing (NGS) were performed with the *QIAamp DNA FFPE Tissue kit* (Qiagen, Hilden, Germany) and the Oncomine™ Solid Tumour DNA Panel Kit (OST, ThermoFisher Scientific, Waltham, USA), respectively, both according to the manufacturer's instructions and as described previously[1]. Ten ng was used as a template to generate genomic libraries. The Oncomine™ Solid Tumour DNA Panel (ThermoFisher Scientific, Waltham, USA), interrogates somatic mutations (substitutions, insertions, deletions and inversions) on 22 genes, including *EGFR*, *ALK*, *ERBB2*, *ERBB4*, *FGFR1*, *FGFR2*, *FGFR3*, *MET*, *DDR2*, *KRAS*, *PIK3CA*, *BRAF*, *AKT1*, *PTEN*, *NRAS*, *MAP2K1*, *STK11*, *NOTCH1*, *CTNNB1*, *SMAD4*, *FBXW7*, and *TP53*. Amplicons were covered on average to a minimum of 500X. To be considered suitable for NGS testing, tumor cells must comprise at least 20% of cells in the sample and there must be more than 300 tumor cells in total.

### *RNA and nCounter*

RNA from formalin-fixed paraffin-embedded (FFPE) and cytological smear samples was extracted with a high purity FFPE RNA isolation kit (Roche, Meylan, France) following the manufacturer's instructions. The total RNA (10-200ng) was hybridized with a custom-designed mixture of biotinylated capture tags and fluorescently labeled reporter probes (*ALK*, *ROS1*, *RET*, *NTRK1*, *METexΔ14*; Elements Chemistry). The panel was customized to identify *ALK*, *ROS1*, *RET*, and *NTRK1* gene fusions, and *METΔex14* [2]. Sample processing, imaging, and counting were performed with nCounter Prep Station and Digital Analyzer automated instruments (NanoString Technologies Inc, Seattle, WA) according to the manufacturer's instructions. Expression levels were collected and normalized with the nSolver analysis software version 2.6 [3, 4]. FFPE samples were considered for analysis if they contained a minimum of 500 cells in total with at least 10% tumor cells.

### *PD-L1 immunohistochemistry*

Immunohistochemistry (IHC) was performed on cytological smears or four-micron deparaffinized, formalin-fixed tissue sections using the PD-L1 IHC 22C3 pharmDx assay (Dako, Glostrup, Denmark; on a Dako Autostainer Link 48) with antigen retrieval and antibody dilutions following manufacturer's recommendations. Human tonsil tissue was used as control. PD-L1 expression in tumor cells was evaluated based on the percentage of PD-L1 positive on the membrane intensity staining pattern. Cases were classified according to the Tumor Proportion Score (TPS) as follows: negative (0 and <1%); low-positive (1-49%); and high-positive (50-100%). A minimum of 100 tumor cells were evaluated per sample and PD-L1 positivity was considered when a membrane stain (partial or complete) of tumor cells  $\geq 1\%$  was observed[5].

**Figure S1.** Techniques performed on cytological and biopsy samples (N = 42). Patients with paired samples are colored in yellow.

|           |                 | P1 | P2 | P3 | P4 | P5 | P6 | P7 | P8 | P9 | P10 | P11 | P12 | P13 | P14 | P15 | P16 | P17 | P18 | P19 | P20 | P21 | P22 | P23 | P24 | P25 | P26 | P27 | P28 | P29 | P30 | P31 | P32 | P33 | P34 | P35 | P36 | P37 | P38 | P39 | P40 | P41 | P42 |   |
|-----------|-----------------|----|----|----|----|----|----|----|----|----|-----|-----|-----|-----|-----|-----|-----|-----|-----|-----|-----|-----|-----|-----|-----|-----|-----|-----|-----|-----|-----|-----|-----|-----|-----|-----|-----|-----|-----|-----|-----|-----|-----|---|
| EBUS-TBNA | NGS             | ✓  | ✓  | ✓  | ⊞  | ✓  | ✓  | ✓  | ✓  | ✓  | ⊞   | ✓   | ✓   | ⊞   | ✓   | ✓   | ✓   | ✓   | ✓   | ✓   | ✓   | ✓   | ✓   | ✓   | ✓   | ✓   | ✓   | ✓   | ⊞   | ✓   | ✓   | ✓   | ✓   | ✓   | ✓   | ✓   | ✓   | ✓   | ✓   | ✓   | ✓   | ✓   | ✓   |   |
|           | nCounter<br>IHC | ✓  | ✓  | ✓  | ✓  | ✓  | ✓  | ✓  | ✓  | ⊞  | ✓   | ✓   | ✓   | ✓   | ✓   | ✓   | ✓   | ✓   | ✓   | ✓   | ✓   | ✓   | ✓   | ✓   | ✓   | ✓   | ✓   | ✓   | ⊞   | ✓   | ✓   | ✓   | ✓   | ✓   | ✓   | ✓   | ✓   | ✓   | ✓   | ✓   | ✓   | ✓   | ✓   | ✓ |
| Biopsy    | NGS             | ✓  | ✓  | ✓  | ⊞  |    |    | ✓  |    | ✓  | ⊞   | ✓   | ✓   | ⊞   | ⊞   | ✓   | ✓   | ✓   | ✓   | ⊞   | ⊞   |     | ✓   |     | ✓   |     | ✓   |     |     |     | ✓   | ✓   | ✓   | ✓   | ✓   | ✓   | ✓   | ✓   | ✓   | ✓   | ✓   | ✓   | ✓   | ✓ |
|           | nCounter<br>IHC | ⊞  | ✓  | ✓  | ✓  |    |    | ✓  |    | ✓  | ⊞   | ✓   | ✓   | ✓   | ⊞   | ⊞   | ✓   | ✓   | ✓   | ✓   | ✓   | ✓   | ✓   |     | ✓   |     | ✓   |     |     |     |     | ✓   | ✓   | ✓   | ✓   | ✓   | ✓   | ✓   | ✓   | ✓   | ✓   | ✓   | ✓   | ✓ |

☒ Done

☐ No biopsy

☒ No evaluable

☒ Insufficient material

**Abbreviations:** Endobronchial ultrasound guided transbronchial needle aspiration (EBUS-TBNA), immunohistochemistry (IHC), next-generation sequencing (NGS), patient (P).

**Table S1.** Comparison of PD-L1 status between paired cytological and biopsy samples (N = 27).

|           |          | Biopsy    |          | Total |
|-----------|----------|-----------|----------|-------|
|           |          | Positive  | Negative |       |
| EBUS-TBNA | Positive | <b>20</b> | 0        | 20    |
|           | Negative | 3         | <b>4</b> | 7     |
|           | Total    | 23        | 4        | 27    |

Number of observed agreements: 24 (88.9% of the observations). Number of agreements expected by chance: 18.1 (66.9% of the observations). Kappa = 0.664 (95% confidence interval from 0.326 to 1.000). Abbreviations: EBUS-TBNA, endobronchial ultrasound-guided transbronchial needle.

**Table S2.** Comparison of PD-L1 immunostaining between paired EBUS-TBNA specimens and biopsy samples (N = 27).

|           |         | Biopsy    |           | Total |
|-----------|---------|-----------|-----------|-------|
|           |         | TPS≥50%   | TPS<50%   |       |
| EBUS-TBNA | TPS≥50% | <b>11</b> | 0         | 11    |
|           | TPS<50% | 5         | <b>11</b> | 16    |
|           | Total   | 16        | 11        | 27    |

Number of observed agreements: 22 (81.5% of the observations). Number of agreements expected by chance: 13.0 (48.3% of the observations). Kappa= 0.642 (95% confidence interval from 0.377 to 0.906). Abbreviations: EBUS-TBNA, endobronchial ultrasound-guided transbronchial needle; TPS, tumor proportion score.

**Table S3.** Characteristics of included studies exploring PD-L1 expression and/or other predictive biomarkers relevant in NSCLC tested by NGS in EBUS-TBNA samples.

| Reference | Year | Smear/<br>Cell Block | N                             | Techniques                               | Molecular Tests                                                             | Comparison<br>histology vs.<br>EBUS-cytology | Study         | Success Rate/ Concordance                                                                                                                          | Other results / Comments                                                                                            |
|-----------|------|----------------------|-------------------------------|------------------------------------------|-----------------------------------------------------------------------------|----------------------------------------------|---------------|----------------------------------------------------------------------------------------------------------------------------------------------------|---------------------------------------------------------------------------------------------------------------------|
| [6]       | 2020 | Cell Block           | 40                            | IHC                                      | PD-L1                                                                       | No                                           | Retrospective | Success Rate 80% (N=32)                                                                                                                            | PD-L1 expression in advanced NSCLC                                                                                  |
| [7]       | 2020 | Cell Block           | 53                            | IHC                                      | PD-L1                                                                       | Yes                                          | Retrospective | Sensitivity 73.3%/Specificity 65.2%/VPN 65.2%/VPP 69.8%<br>Concordance 69.8% cutoff TPS≥1% (N=37)                                                  | EBUS-TBNA samples are suitable for PD-L1 testing, especially using cutoff of TPS≥50%, concordance of 79.2% (42 pts) |
| [8]       | 2020 | Cell Block           | 189                           | IHC                                      | PD-L1                                                                       | No                                           | Retrospective | Success Rate 94.7% (N=179)                                                                                                                         | EBUS sample are adequate for PD-L1 testing                                                                          |
| [9]       | 2020 | Cell Block           | 120                           | IHC                                      | PD-L1                                                                       | Partial (N=18)                               | Retrospective | Success Rate 92% (N=110)<br>Concordance 78% (N=18)                                                                                                 | PD-L1 higher in EBUS than histologic samples; 5/18 discordant cases TPS≥50%                                         |
| [10]      | 2019 | -                    | 50<br>(TBNA 27/<br>Stylet 23) | NGS/FISH/<br>IHC                         | NGS/ALK/<br>PD-L1<br>(Techniques not specified)                             | No                                           | Retrospective | Success Rate (Stylet Retracted Partially vs Completely): NGS 88.9% (N=24)/91.3% (N=21); ALK 88.9% N=24//87% (N=20); PD-L1 85.2% (N=23)/ 87% (N=20) | Diagnostic yield comparison of EBUS-TBNA vs Stylet removal for molecular testing. PD-L1 cutoff TPS >50 or <50%.     |
| [11]      | 2019 | Cell Block           | 85                            | NGS/IHC/<br>RTPCR/<br>FISH               | EGFR/ALK/<br>ROS1/ NGS<br>(Lung Core1, 56 genes)                            | No                                           | Prospective   | Success Rate 91% (N=77)                                                                                                                            | 100% concordant results between single gene and NGS testing                                                         |
| [12]      | 2019 | Cell Block           | 71                            | IHC                                      | PD-L1                                                                       | Yes                                          | Retrospective | Concordance : EBUS vs TBB 83.8% (N=68)<br>EBUS vs Resected Primary 84.6% (N=13)<br>EBUS vs Resected Metastases 86.7% (N=15)                        | Concordance: TPS cutoff 1%<br>PD-L1 TPS higher in resected tumors than in EBUS-TBNA                                 |
| [13]      | 2019 | Cell Block           | 265                           | IHC                                      | PD-L1                                                                       | Partial (N=34)                               | Prospective   | Success Rate 86.8% (N=230)<br>Concordance 91.3% (N=31)                                                                                             | TPS≥50% higher in EBUS<br>EBUS-FNA 100% agrees with histology samples- same anatomic site (N=16)                    |
| [14]      | 2019 | Both                 | 67                            | NGS                                      | TruSeq Amplicon Cancer Panel 48 gene                                        | No                                           | Prospective   | Success Rate: 92.5%<br>Concordance: 73% (N=33)                                                                                                     | EBUS-TBNA smears vs EBUS-TBNA cell-blocks<br>Smears are recommended as primary source of DNA for NGS in EBUS-TBNA   |
| [15]      | 2018 | Cell Block           | 61                            | IHC                                      | PD-L1                                                                       | Yes                                          | Retrospective | Concordance:<br>87% cutoff TPS≥1% (N=53)<br>82% cutoff TPS≥50% (N=50)                                                                              | EBUS vs Resected<br>Using a cutoff TPS≥50%, EBUS-TBNA specimens may misclassify the status of PD-L1                 |
| [16]      | 2018 | Cell Block           | 398                           | Sanger or<br>NGS /IHC/<br>FISH/<br>RTPCR | EGFR/ KRAS/<br>ALK/ BRAF/<br>PI3K /HER2<br>NGS (Sentosa SQ NSCLC, 11 genes) | No                                           | Prospective   | Success Rate: 79.4%<br>(all techniques, N=316)                                                                                                     | RTPCR test (EGFR/KRAS) in 43 cases<br>EBUS-FNA provides high-quality material for tumor genotyping                  |

|      |      |            |     |                                    |                                                             |     |               |                                                                                                                                                                                                                                                                                                                                                                           |                                                                                                                                                                       |
|------|------|------------|-----|------------------------------------|-------------------------------------------------------------|-----|---------------|---------------------------------------------------------------------------------------------------------------------------------------------------------------------------------------------------------------------------------------------------------------------------------------------------------------------------------------------------------------------------|-----------------------------------------------------------------------------------------------------------------------------------------------------------------------|
| [17] | 2018 | Cell Block | 50  | NGS / FISH/<br>IHC                 | NGS (GatorSeq<br>76 genes)/<br>ALK/ PD-L1                   | No  | Retrospective | Success Rate: 82%<br>(all techniques, N=41)                                                                                                                                                                                                                                                                                                                               | EBUS-TBNA is effective and has a high<br>proportion of satisfactory results for test-<br>ing PD-L1 expression on tumor cells in<br>addition to NGS and ALK FISH       |
| [18] | 2018 | Cell Block | 115 | NGS                                | NGS<br>(MSK IMPACT,<br>368 genes)                           | No  | Retrospective | Success Rate: 86.1%<br>(N=99)                                                                                                                                                                                                                                                                                                                                             | EBUS-TBNA reliably provided adequate<br>tissue for hybrid capture NGS                                                                                                 |
| [19] | 2018 | Cell Block | 69  | PCR, direct<br>sequencing/<br>FISH | EGFR/KRAS/<br>ROS1/ALK                                      | No  | Prospective   | Success Rate: 69.6%<br>(all techniques, N=48)                                                                                                                                                                                                                                                                                                                             | EBUS-TBNA with a 21-gauge needle is<br>appropriate for the analysis of multiple<br>mutations and the genotyping of lung ad-<br>enocarcinoma                           |
| [20] | 2017 | Both       | 54  | NGS                                | OncoScreen<br>(50 genes)<br>OncoPlus (1213<br>genes) panels | No  | Retrospective | Success Rate: OncoScreen, 98.0% (N=49);<br>OncoPlus, 91.4% (N=32)                                                                                                                                                                                                                                                                                                         | Success rate of NGS testing of EBUS sam-<br>ples utilizing 22- & 25-gauge needles. The<br>size of the needle does not seem to affect<br>the success rate of NGS tests |
| [21] | 2017 | Cell Block | 97  | IHC                                | PD-L1                                                       | Yes | Prospective   | Concordance: All $r \geq 0.48$ , $P < .087$<br>EBUS <i>vs</i> resected primary $r = 0.75$ , $P = .086$ , $N = 6$ ,<br>EBUS <i>vs</i> lymph node $r = 0.93$ , $P = .02$ , $N = 5$ ; EBUS<br>& TBB $r = 0.75$ , $P < 0.001$ , $N = 16$ ; TBB & primary tu-<br>mor $r = 0.52$ , $P < 0.001$ , $N = 41$ ; lymph node & pri-<br>mary tumor $r = 0.48$ , $P < 0.001$ , $N = 47$ | EBUS-TBNA is a promising method to<br>evaluate PD-L1 expression.<br>No cutoff of PD-L1 was used                                                                       |

**Abbreviations:** EBUS guided fine-needle aspiration (EBUS FNA), endobronchial ultrasound-guided transbronchial needle aspiration (EBUS-TBNA), immunohistochemistry (IHC), fluorescent in situ hybridization (FISH), next-generation sequencing (NGS), non-small cell lung cancer (NSCLC), reverse transcription polymerase chain reaction (RT-PCR), transbronchial biopsy (TBB), tumor proportion score (TPS), positive predictive value (VPP), negative predictive value (VPN).

## References

- Castillo, P.; Marginet, M.; Jares, P.; García, M.; Gonzalvo, E.; Arance, A.; García, A.; Alos, L.; Teixidó, C. Implementation of an NGS panel for clinical practice in paraffin-embedded tissue samples from locally advanced and metastatic melanoma patients. *Explor. Target Antitumor Ther.* **2020**, *1*, 101–108, doi:10.37349/etat.2020.00006
- Marin, E.; Teixido, C.; Carmona-Rocha, E.; Reyes, R.; Arcocha, A.; Viñolas, N.; Rodríguez-Mues, M.; Cabrera, C.; Sánchez, M.; Vollmer, I.; et al. Usefulness of Two Independent DNA and RNA Tissue-Based Multiplex Assays for the Routine Care of Advanced NSCLC Patients. *Cancers* **2020**, *12*, 1124, doi:10.3390/cancers12051124.
- Reguart, N.; Teixidó, C.; Giménez-Capitán, A.; Paré, L.; Galván, P.; Viteri, S.; Rodríguez, S.; Peg, V.; Aldeguer, E.; Viñolas, N.; et al. Prat A. Identification of ALK, ROS1, and RET fusions by a multiplexed mRNA-based assay in formalin-fixed, paraffin-embedded samples from advanced non-small-cell lung cancer patients. *Clin. Chem.* **2017**, *63*, 751–760.
- Reguart, N.; Teixido, C.; Gimenez-Capitan, A.; Vilariño, N.; Arcocha, A.; Jares, P.; Castillo, S.; Bernal, X.; Muñoz, S.; Palmero, R.; et al. P1.01-075 Simultaneous Multiplex Profiling of Gene Fusions, METe14 Mutations and Immune Genes in Advanced NSCLC by NCounter Technology. *J. Thorac. Oncol.* **2017**, *12*, S1923, doi:10.1016/j.jtho.2017.09.729.
- Teixidó, C.; Vilariño, N.; Reyes, R.; Reguart, N. PD-L1 expression testing in non-small cell lung cancer. *Ther. Adv. Med Oncol.* **2018**, *10*, doi:10.1177/1758835918763493.
- Mineura, K.; Hamaji, M.; Yoshizawa, A.; Nakajima, N.; Kayawake, H.; Tanaka, S.; Yamada, Y.; Yutaka, Y.; Nakajima, D.; Ohsumi, A.; et al. Diagnostic yield of endobronchial ultrasound-guided transbronchial needle aspiration to assess tumor-programmed cell death ligand-1 expression in mediastinal lymph nodes metastasized from non-small cell lung cancer. *Surg. Today* **2020**, *50*, 1049–1055, doi:10.1007/s00595-020-01989-6.
- Jug, R.; Giovacchini, C.X.; Liu, B.; Green, C.L.; Clarke, J.M.; Mahmood, K.; Pavlisko, E.N. EBUS-FNA cytologic-histologic correlation of PD-L1 immunohistochemistry in non-small cell lung cancer. *J. Am. Soc. Cytopathol.* **2020**, *9*, 485–93, doi:10.1016/j.jasc.2020.04.003.
- Perrotta, F.; Nankivell, M.; Adizie, J.B.; Maqsood, U.; Elshafi, M.; Jafri, S.; Lerner, A.D.; Woolhouse, I.; Munavvar, M.; Evison, M.; et al. Endobronchial Ultrasound-Guided Transbronchial Needle Aspiration for PD-L1 Testing in Non-small Cell Lung Cancer. *Chest* **2020**, *158*, 1230–1239.
- Smith, A.; Wang, H.; Zerbo, A.; Beaudoin, S.; Ofiara, L.; Fiset, P.-O.; Benedetti, A.; Gonzalez, A.V. Programmed Death Ligand 1 Testing of Endobronchial Ultrasound-guided Transbronchial Needle Aspiration Samples Acquired for the Diagnosis and Staging of Non-Small Cell Lung Cancer. *J. Bronchol. Interv. Pulmonol.* **2020**, *27*, 50–57, doi:10.1097/lbr.0000000000000623.
- Fernandez-Bussy, S.; Biswas, A.; Labarca, G.; Jantz, M.A.; Mehta, H.J. Comparison of Endobronchial Ultrasound-guided Transbronchial Needle Aspiration With Stylet Retracted Partially Versus Completely for Molecular Testing. *J. Bronchol. Interv. Pulmonol.* **2019**, *26*, 222–224, doi:10.1097/lbr.0000000000000596.
- Xie, F.; Zheng, X.; Mao, X.; Zhao, R.; Ye, J.; Zhang, Y.; Sun, J. Next-Generation Sequencing for Genotyping of Endobronchial Ultrasound-Guided Transbronchial Needle Aspiration Samples in Lung Cancer. *Ann. Thorac. Surg.* **2019**, *108*, 219–226, doi:10.1016/j.athoracsur.2019.02.010.
- Yoshimura, K.; Inoue, Y.; Karayama, M.; Tsuchiya, K.; Mori, K.; Suzuki, Y.; Iwashita, Y.; Kahyo, T.; Kawase, A.; Tanahashi, M.; et al. Heterogeneity analysis of PD-L1 expression and copy number status in EBUS-TBNA biopsy specimens of non-small cell lung cancer: Comparative assessment of primary and metastatic sites. *Lung Cancer* **2019**, *134*, 202–209, doi:10.1016/j.lungcan.2019.06.002.
- Wang, G.; Ionescu, D.N.; Lee, C.-H.; Hiruki, T.; Myers, R.; Shaipanich, T.; Lam, S.; Melosky, B.; Zhou, C. PD-L1 testing on the EBUS-FNA cytology specimens of non-small cell lung cancer. *Lung Cancer* **2019**, *136*, 1–5, doi:10.1016/j.lungcan.2019.07.033.
- Fielding, D.; Dalley, A.J.; Bashirzadeh, F.; Singh, M.; Nandakumar, L.; Reed, A.E.M.; Black, D.; Kazakoff, S.; Pearson, J.V.; Nones, K.; et al. Diff-Quik Cytology Smears from Endobronchial Ultrasound Transbronchial Needle Aspiration Lymph Node Specimens as a Source of DNA for Next-Generation Sequencing Instead of Cell Blocks. *Respir.* **2019**, *97*, 525–539, doi:10.1159/000495661.
- Sakata, K.K.; Midthun, D.E.; Mullon, J.J.; Kern, R.M.; Nelson, D.R.; Edell, E.S.; Schiavo, D.N.; Jett, J.R.; Aubry, M.C. Comparison of Programmed Death Ligand-1 Immunohistochemical Staining Between Endobronchial Ultrasound Transbronchial Needle Aspiration and Resected Lung Cancer Specimens. *Chest* **2018**, *154*, 827–837, doi:10.1016/j.chest.2018.07.017.
- Ghigna, M.-R.; Crutu, A.; Florea, V.; Feuillet-Sommer, S.; Baldeyrou, P.; Adam, J.; Lacroix, L.; Besse, B.; Mercier, O.; Fadel, E.; et al. Endobronchial ultrasound-guided fine-needle aspiration for pulmonary carcinomas genotyping: experience with 398 cases including rapid EGFR/KRAS analysis in 43 cases. *J. Thorac. Dis.* **2018**, *10*, 4653–4658, doi:10.21037/jtd.2018.06.157.
- Biswas, A.; Leon, M.E.; Drew, P.; Fernandez-Bussy, S.; Furtado, L.V.; Jantz, M.A.; Mehta, H.J. Clinical performance of endobronchial ultrasound-guided transbronchial needle aspiration for assessing programmed death ligand-1 expression in nonsmall cell lung cancer. *Diagn. Cytopathol.* **2018**, *46*, 378–383, doi:10.1002/dc.23900.
- Turner, S.R.; Buonocore, D.; Desmeules, P.; Rekhman, N.; Dogan, S.; Lin, O.; Arcila, M.E.; Jones, D.R.; Huang, J. Feasibility of endobronchial ultrasound transbronchial needle aspiration for massively parallel next-generation sequencing in thoracic cancer patients. *Lung Cancer* **2018**, *119*, 85–90.
- Raad, S.; Hanna, N.; Jalal, S.; Bendaly, E.; Zhang, C.; Nuguru, S.; Oueini, H.; Diab, K. Endobronchial Ultrasound-Guided Transbronchial Needle Aspiration Use for Subclassification and Genotyping of Lung Non-Small-Cell Carcinoma. *South. Med. J.* **2018**, *111*, 484–488, doi:10.14423/smj.0000000000000846.

20. Stoy, S.P.; Segal, J.P.; Mueller, J.; Furtado, L.V.; Vokes, E.E.; Patel, J.D.; Murgu, S. Feasibility of Endobronchial Ultrasound-guided Transbronchial Needle Aspiration Cytology Specimens for Next Generation Sequencing in Non-small-cell Lung Cancer. *Clin. Lung Cancer* 2018, 19, 230–238.e2, doi:10.1016/j.clcc.2017.11.010.
21. Sakakibara, R.; Inamura, K.; Tambo, Y.; Ninomiya, H.; Kitazono, S.; Yanagitani, N.; Horiike, A.; Ohyanagi, F.; Matsuura, Y.; Nakao, M.; et al. EBUS-TBNA as a Promising Method for the Evaluation of Tumor PD-L1 Expression in Lung Cancer. *Clin. Lung Cancer* 2017, 18, 527–534.e1, doi:10.1016/j.clcc.2016.12.002.
